# Supplementary material for: Effects of an educational intervention to strengthen humanistic practice on haemodialysis nurses’ caring attitudes and behaviours and quality of working life: a cluster randomised controlled trial
Source: Research Square preprint supplement (doi:10.21203/rs.3.rs-288447/v1), 2021-03-30
Supplement: Supplementary file 1 [file d00ea65ad5701eecbc9204dc.docx]

*Chart 4 – Quality of working life dimensions by data collection time point for control group*
